# Supplementary material for: MyD88 TIR domain higher-order assembly interactions revealed by microcrystal electron diffraction and serial femtosecond crystallography
Source: PubMed Central journal article supplement (PMC8110528; doi:10.1038/s41467-021-22590-6), 2021-05-10
Supplement: 41467_2021_22590_MOESM3_ESM.pdf [file 41467_2021_22590_MOESM3_ESM.pdf]

## Description of Additional Supplementary Files

**Supplementary Movie 1.** MAL<sup>TIR</sup> nucleates MyD88<sup>TIR</sup> assembly formation unidirectionally. Movie of MyD88<sup>TIR</sup> microcrystal formation from GFP-MAL<sup>TIR</sup>-MyD88<sup>TIR</sup> seeds. Scale bar: 10  $\mu\text{m}$
